# Supplementary material for: Rising Disparity in Sustainable Nitrogen Management Across Indian Croplands
Source: Research Square preprint supplement (doi:10.21203/rs.3.rs-7657224/v1), 2025-09-25
Supplement: Supplementary file 1 [file 0ddfc8221882cc971f7d9991.pdf]

# Supplementary Information

## Rising Disparity in Nitrogen Management across Indian Croplands

Shekhar Sharan Goyal<sup>1,\*</sup>, Udit Bhatia<sup>2</sup>, Wim de Vries<sup>3</sup>, Rohini Kumar<sup>1,\*</sup>

<sup>1</sup> Computational Hydrosystems, Helmholtz Centre for Environmental Research – UFZ, Leipzig, Germany.

<sup>2</sup> Discipline of Civil Engineering, Indian Institute of Technology Gandhinagar, Palaj, Gandhinagar 382055, Gujarat, India.

<sup>3</sup> Environmental Systems Analysis Group, Wageningen University, Wageningen, The Netherlands.

\*Corresponding authors: shekhar-sharan.goyal@ufz.de, rohini.kumar@ufz.de

# SNMI Time Series for Agro-Climatic Zones

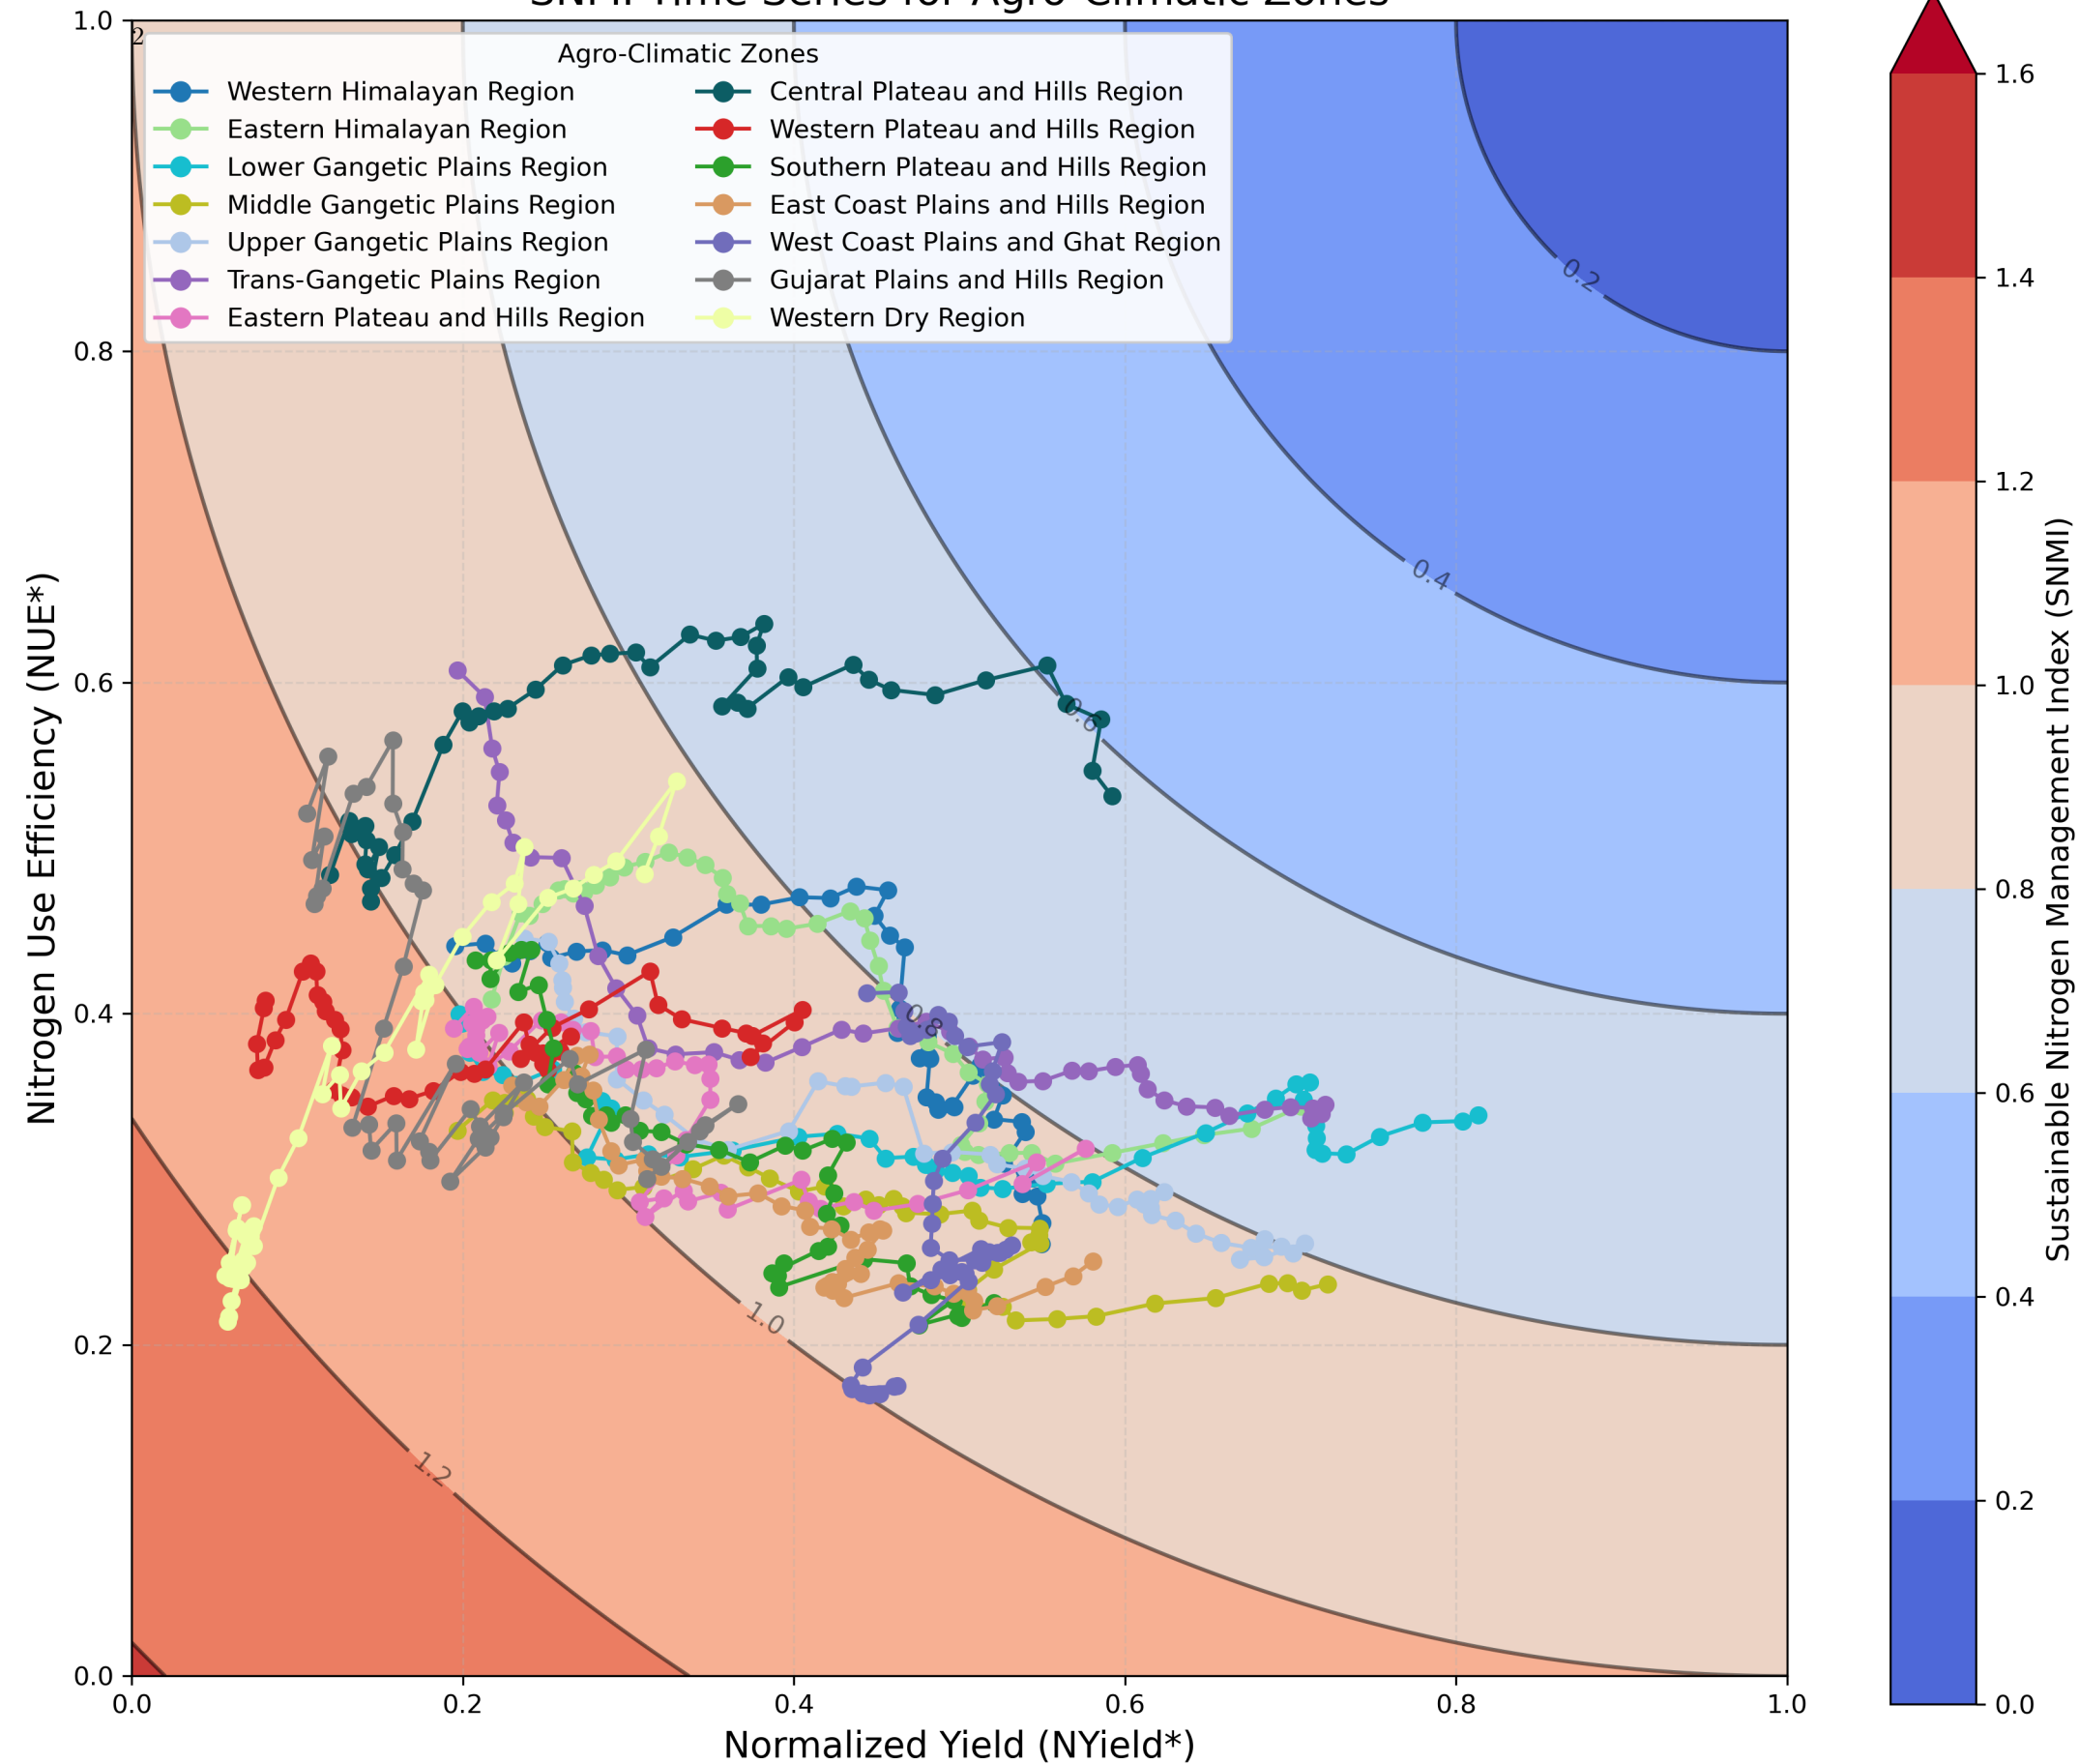

Supplementary Figure 1 – **Trajectories of nitrogen use efficiency (NUE\*) and normalized yield (NYield\*) across Indian agro-climatic regions.** The plot shows temporal trajectories (1966–2015) for each agro-climatic region in NUE\*–NYield\* space, with background contours and color shading representing the Sustainable Nitrogen Management Index (SNMI). SNMI is computed as the Euclidean distance from optimal nitrogen management, with lower values (blue) indicating higher sustainability. Normalized yield values are benchmarked to the 90th percentile of region-specific maximum yield to capture food security potential. Divergent regional pathways illustrate heterogeneous progress toward sustainable nitrogen use.

## Temporal Evolution of SNMI Across Regions

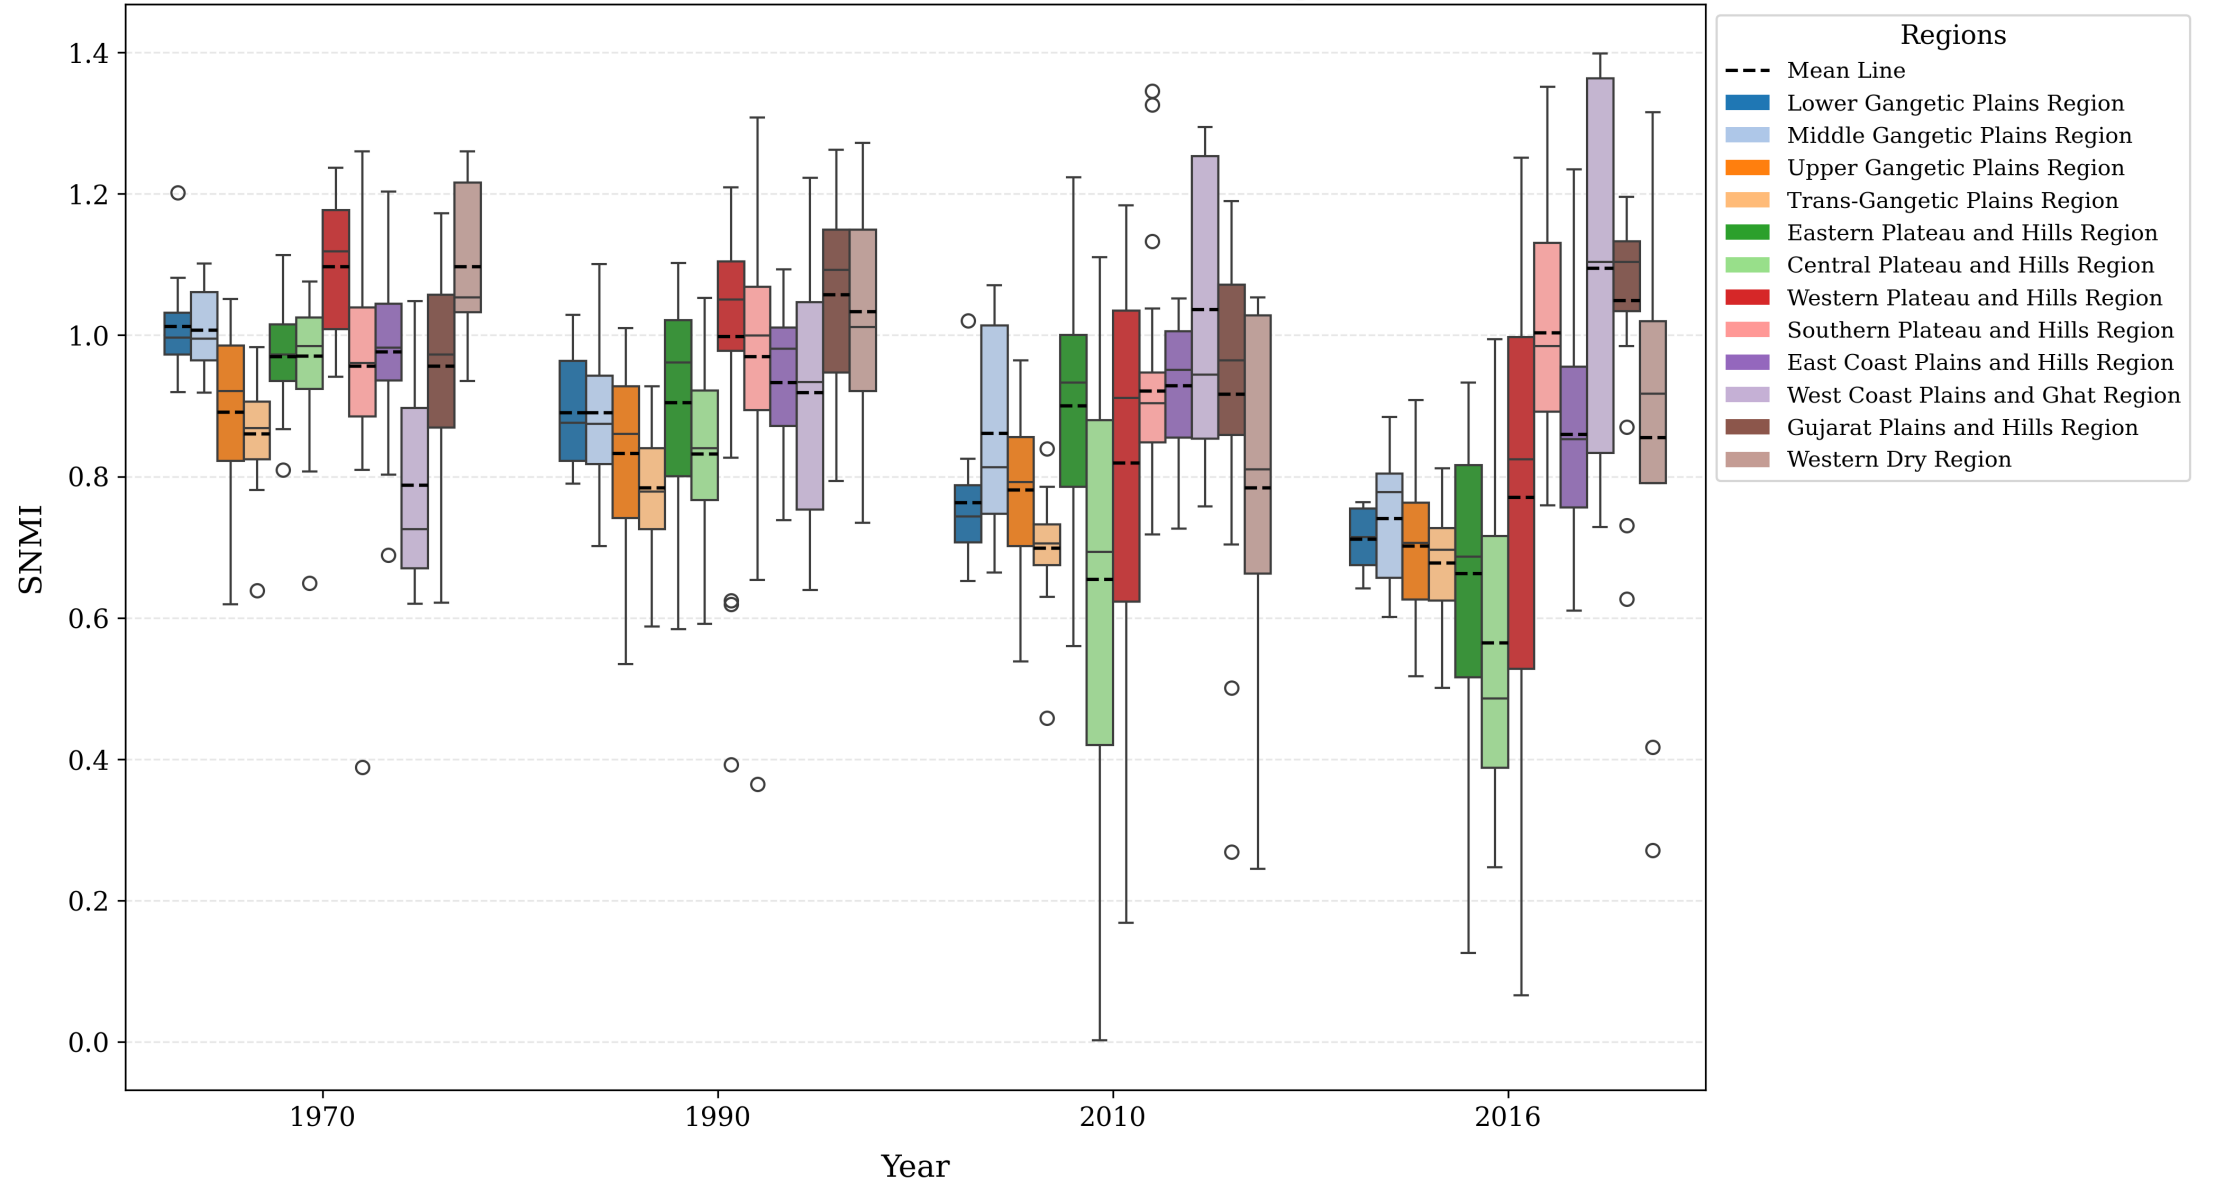



Supplementary Figure 2 – **Temporal trends in inter- and intra-regional variability of the Sustainable Nitrogen Management Index (SNMI).** The figure tracks the mean SNMI across India’s agroclimatic regions, referencing region-specific maximum achievable yields.

a

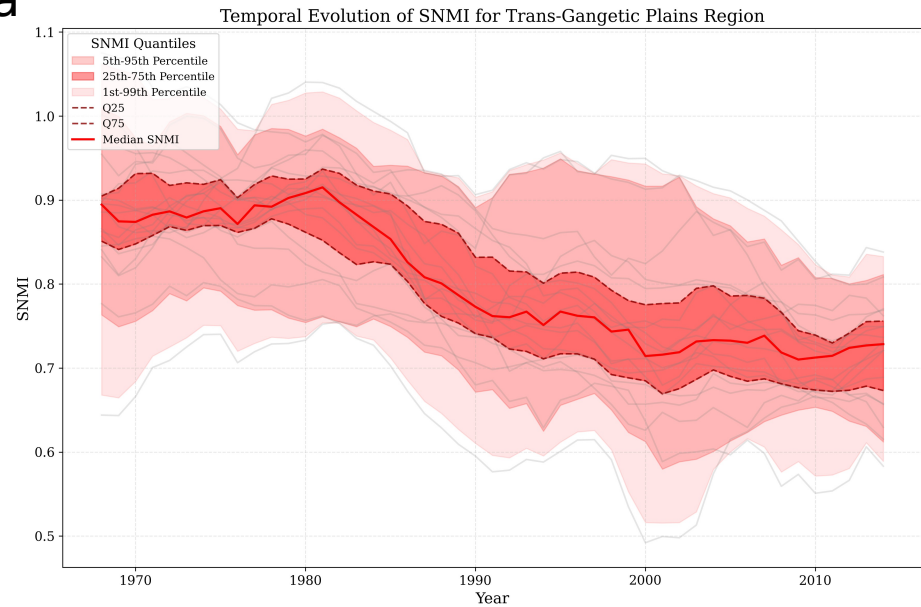

b

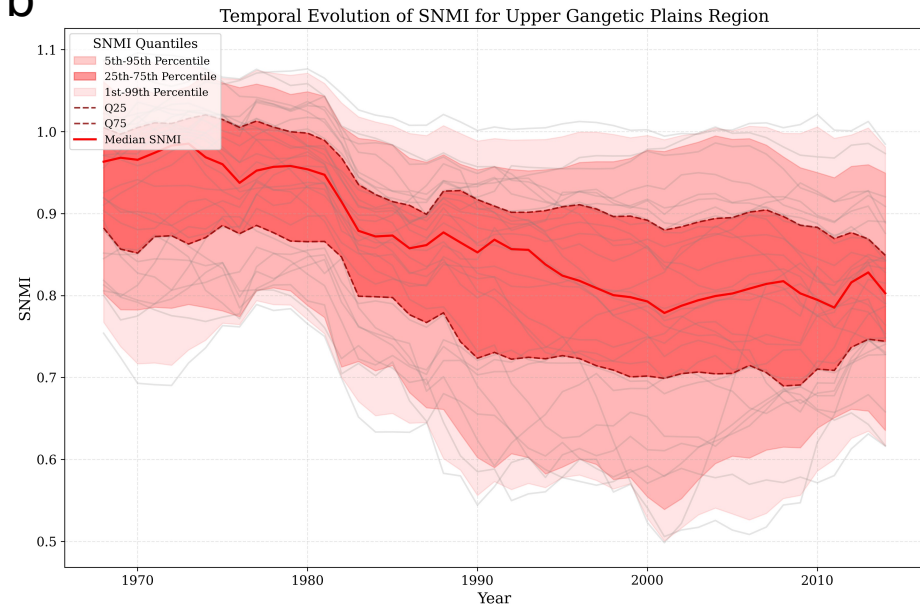

c

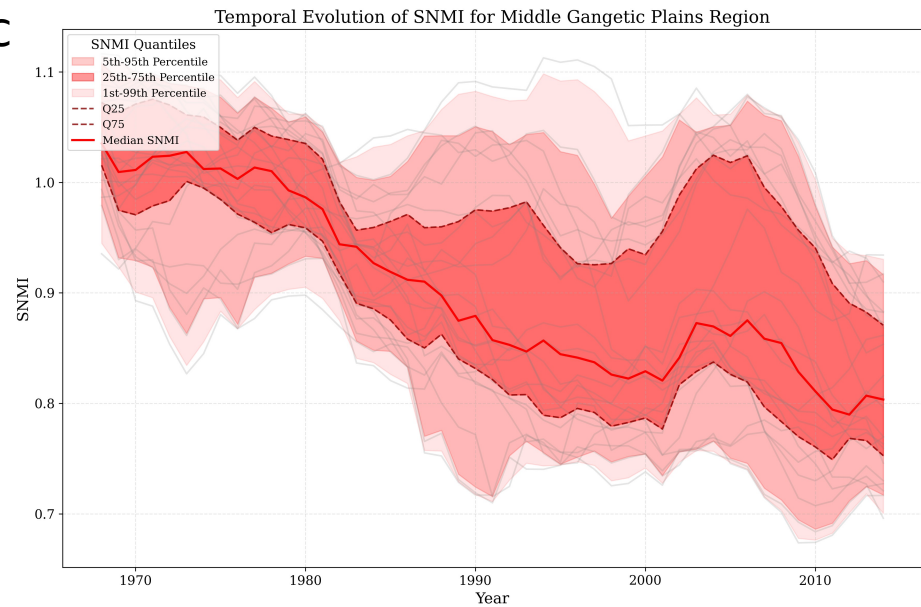

d

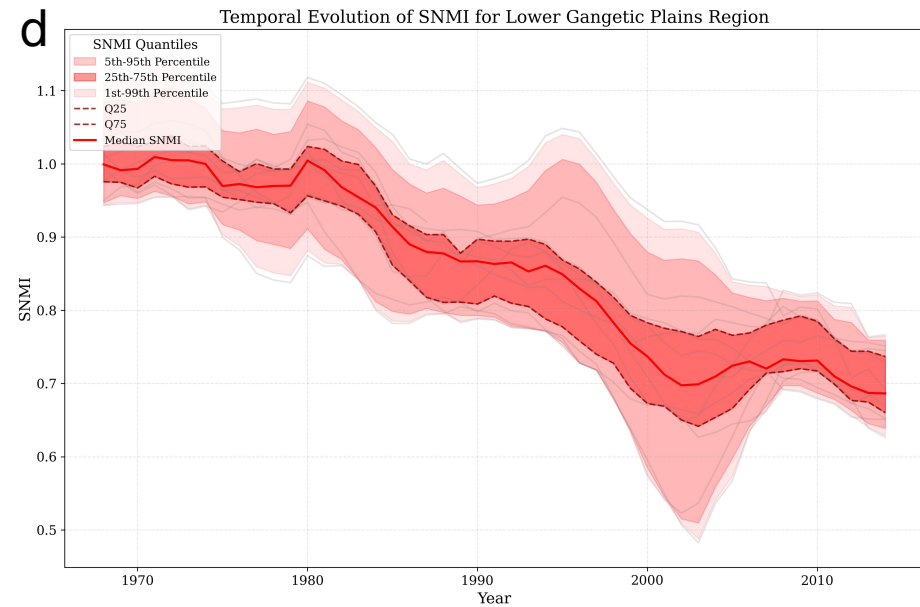

Supplementary Figure 3 – **Rising temporal variability in SNMI across the Indo-Gangetic plains.** Panels (a–b) represent the Trans- and Upper Gangetic plains, whereas panels (c–d) correspond to the Middle and Lower Gangetic regions. The dark red line denotes mean SNMI, with shaded areas indicating variability across different percentiles.

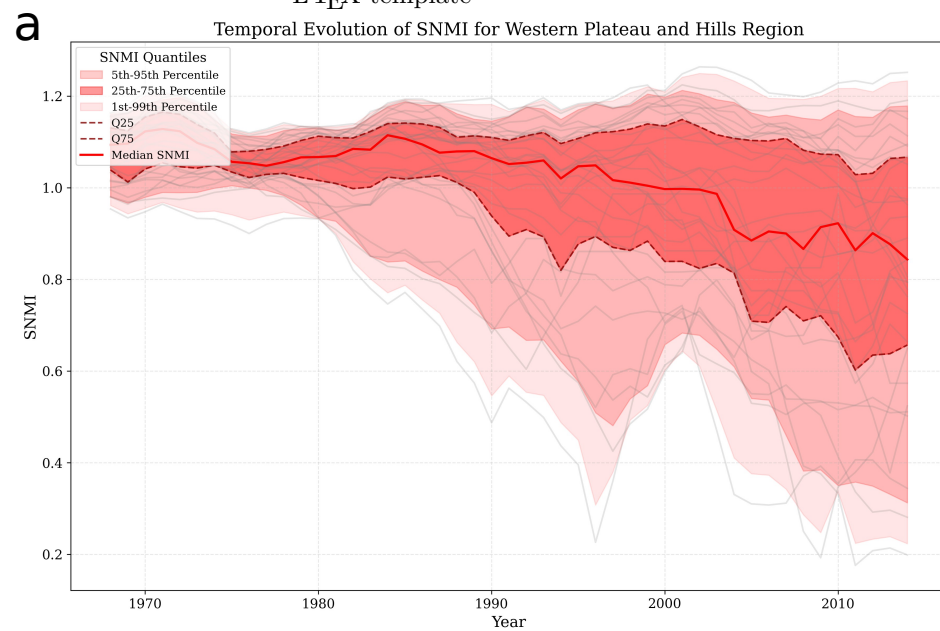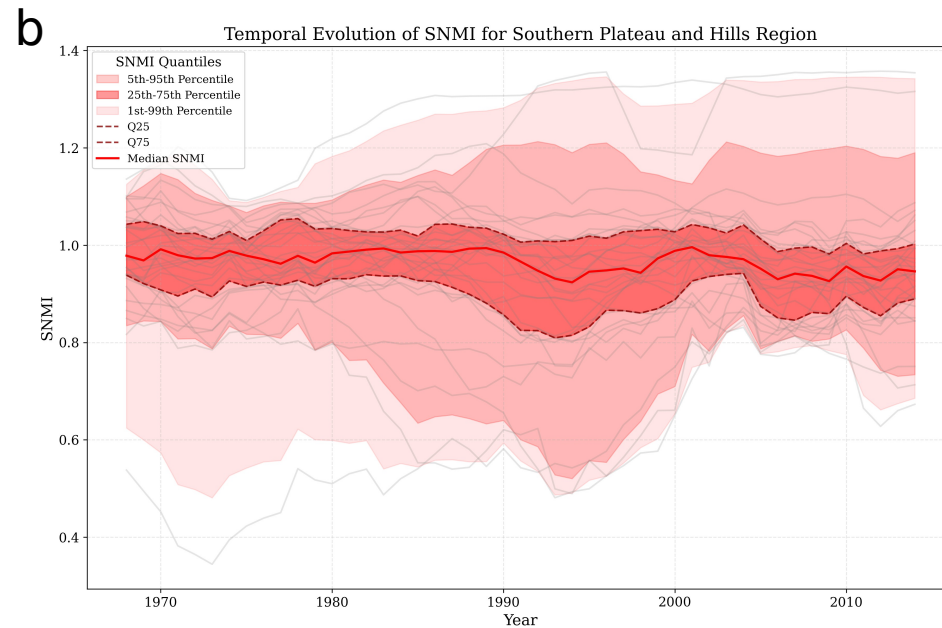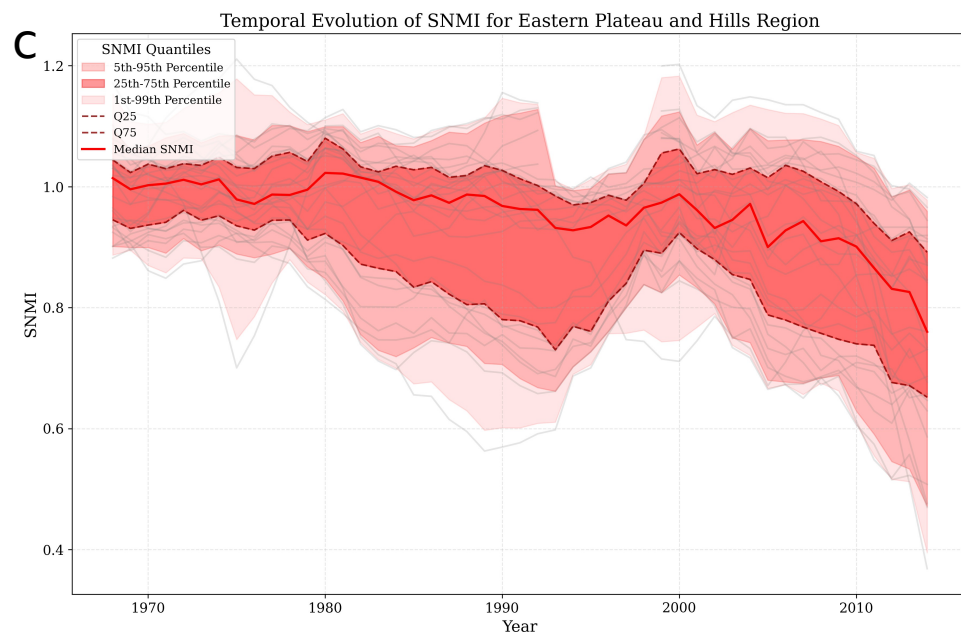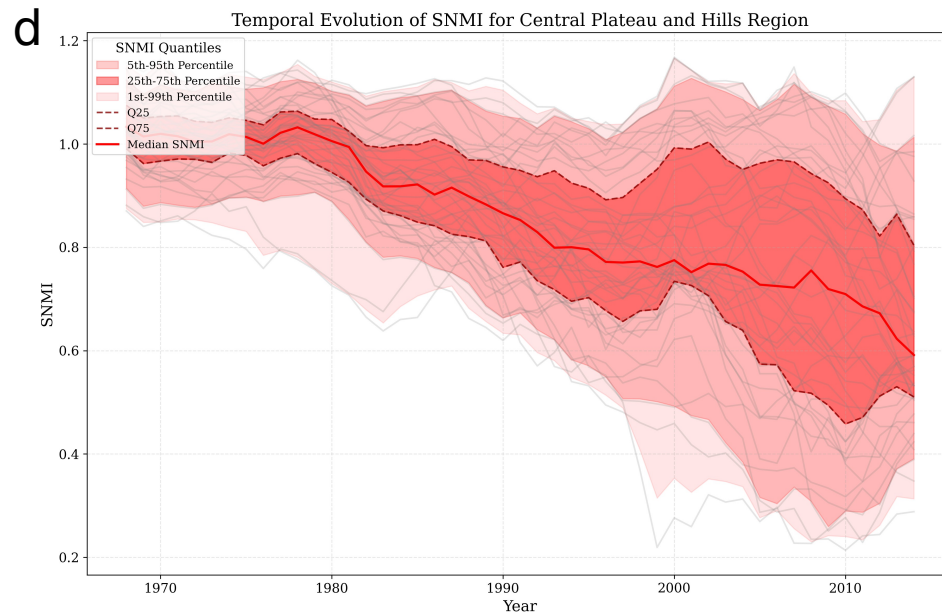

Supplementary Figure 4 – **Rising temporal variability of SNMI across India’s plateau regions.** Panels (a–b) focus on the Western and Southern plateaus, while panels (c–d) detail trends in the Eastern and Central plateau regions. Mean SNMI is represented by a dark red line, with shaded percentiles highlighting the extent of regional variability.

**a**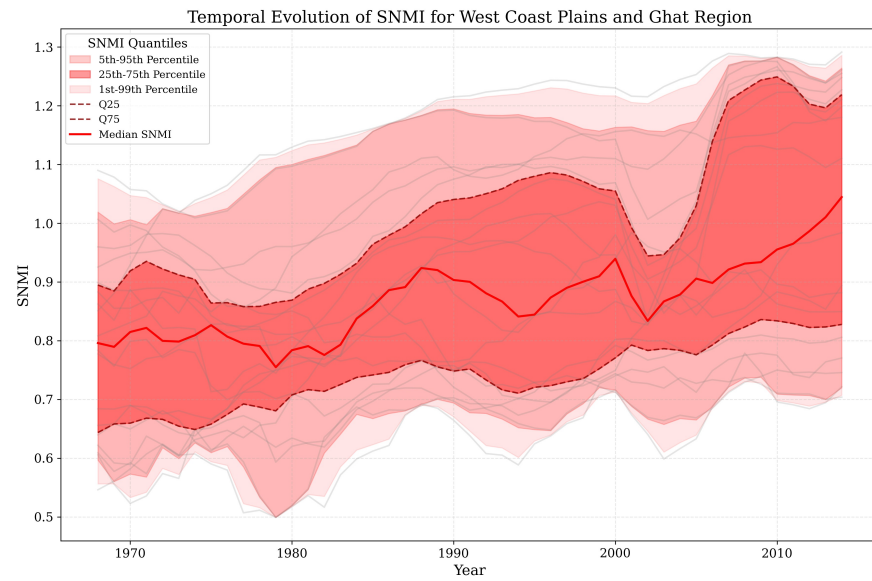**b**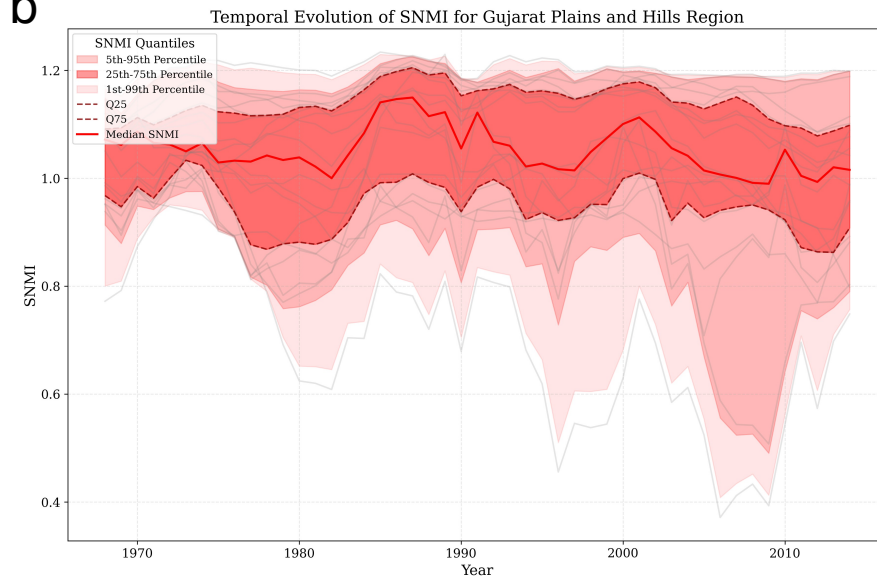**c**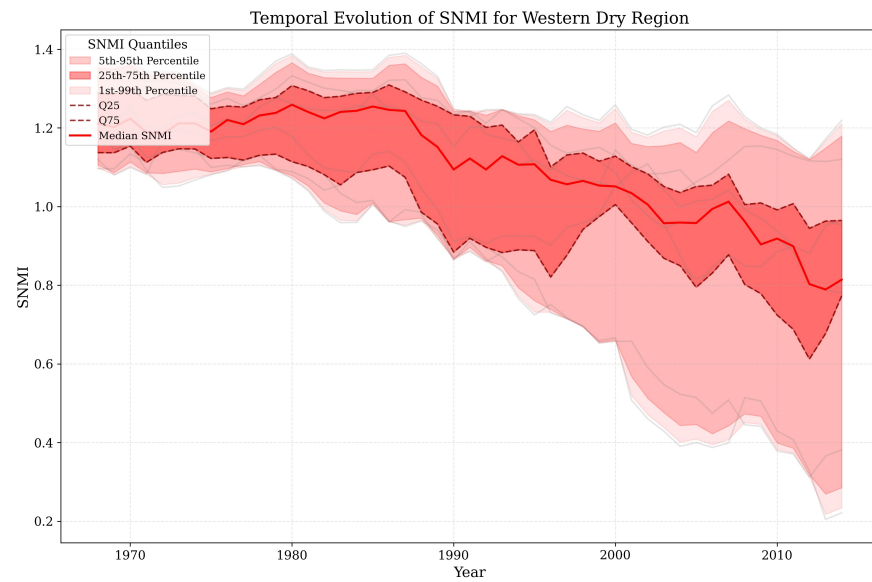

Supplementary Figure 5 – **Rising SNMI variability across plains and coastal regions of India.** Panels (a–b) illustrate SNMI trends and variability for the Western Ghats and Gujarat plains, with panel (c) representing the Western Dry region. The dark red lines represent mean SNMI trends, and shaded areas denote percentile-based variability ranges.

## Agro-Climatic Regions

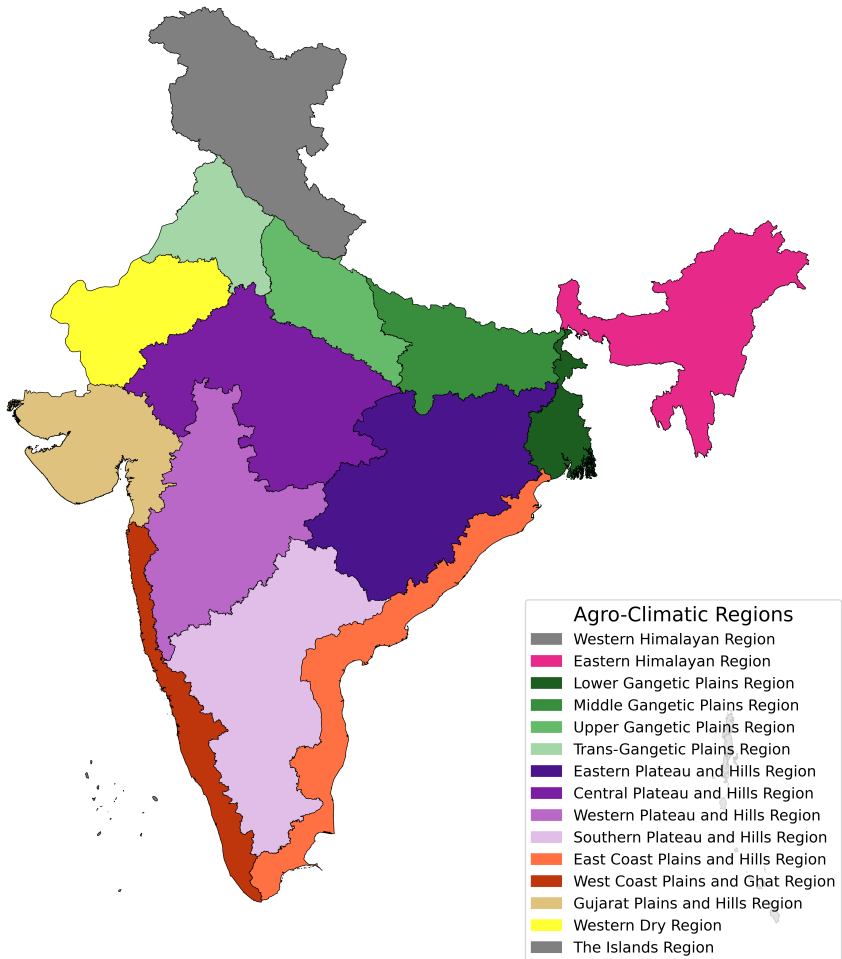



Supplementary Figure 6 – **Agro-climatic zones of India.** Map of India's agro-climatic zones used to define each region throughout the study[1].

## Temporal Changes in Coefficient of Variation for SNMI

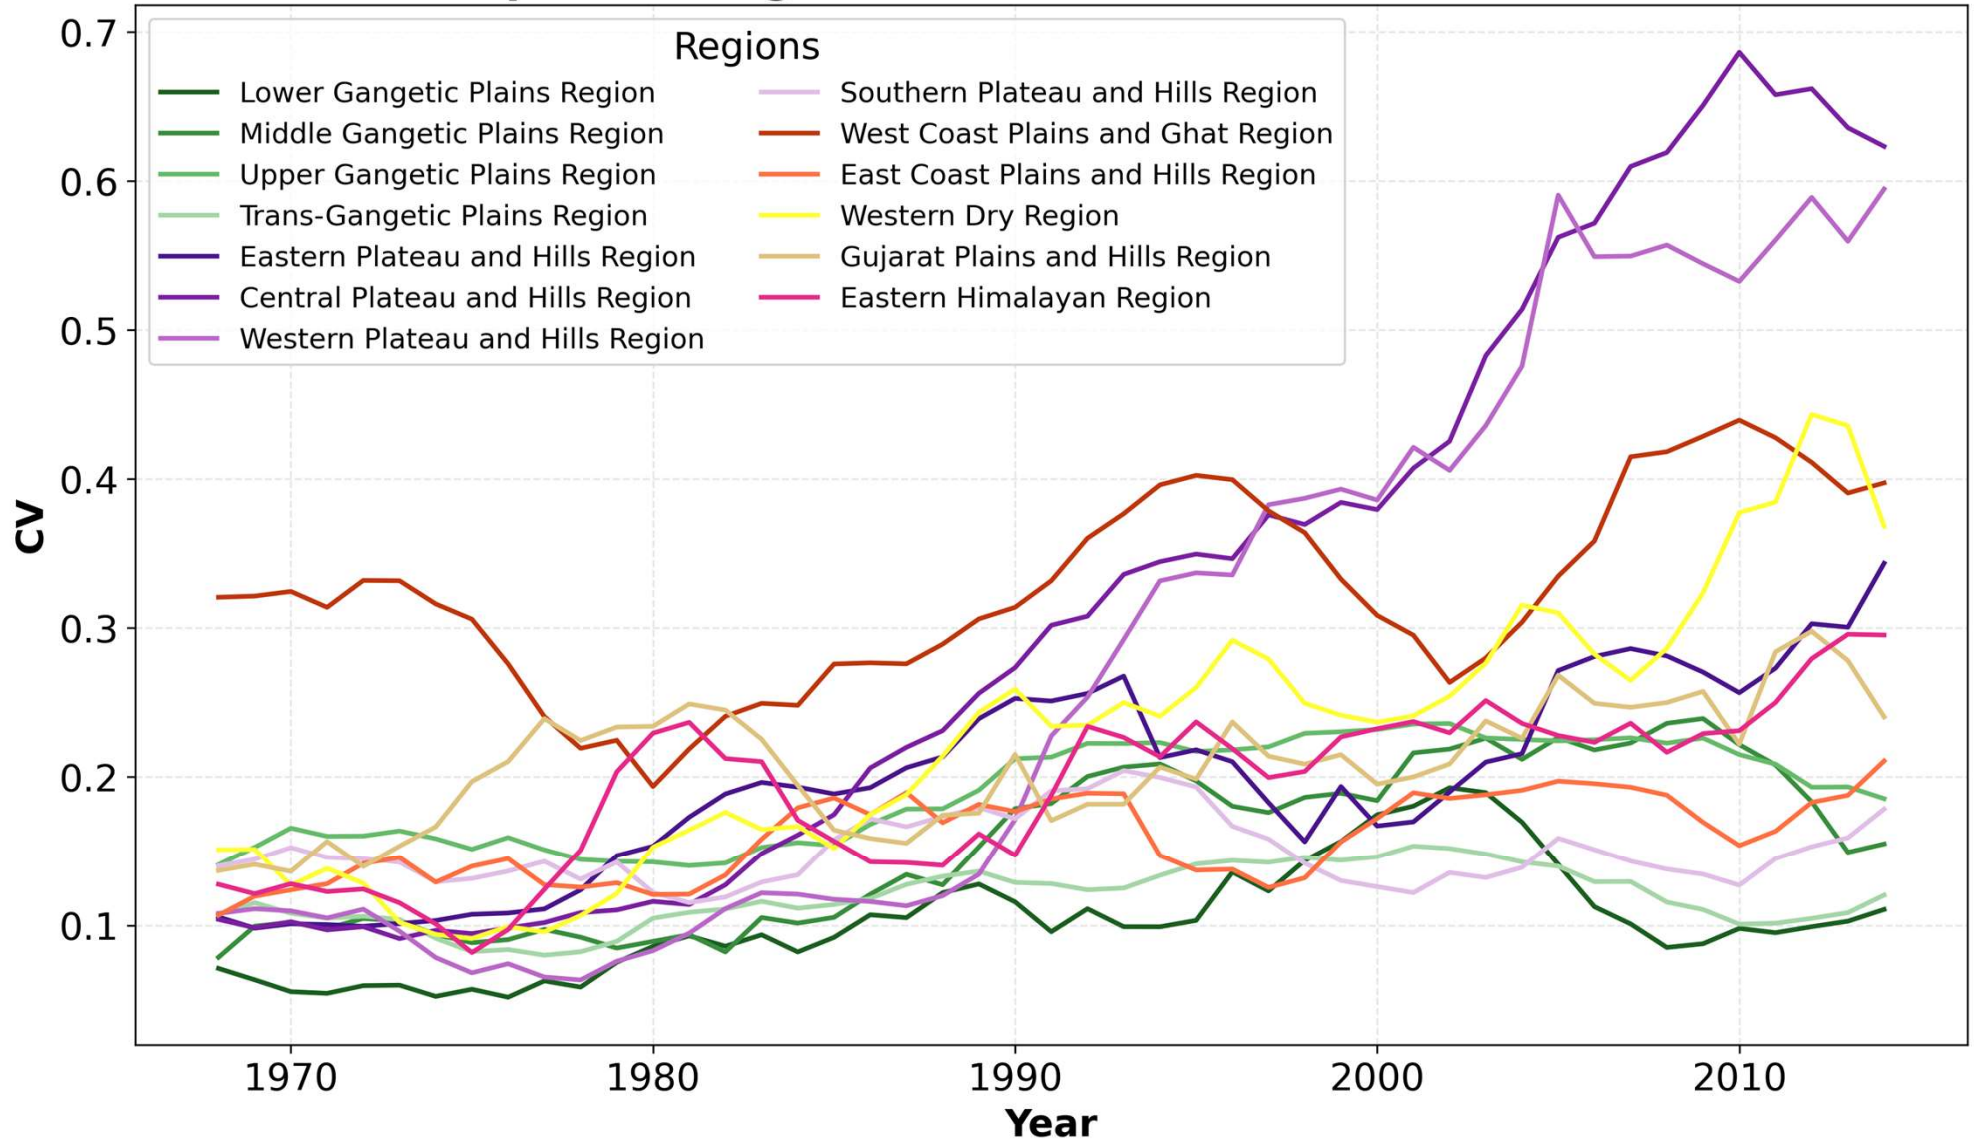

Supplementary Figure 7 – **Temporal trends in the coefficient of variation (CV) for the Sustainable Nitrogen Management Index (SNMI) across Indian agro-climatic regions.** The CV of SNMI is used to evaluate intra-regional variability from 1966 to 2015. An upward trend in CV indicates increasing spatial disparities in sustainable nitrogen use within regions. Notably, the Western and Central Plateau and Hills regions exhibit substantial increases in variability.

Fertilizer Nitrogen Application by Crop, State, and Irrigation Status (kg/ha)

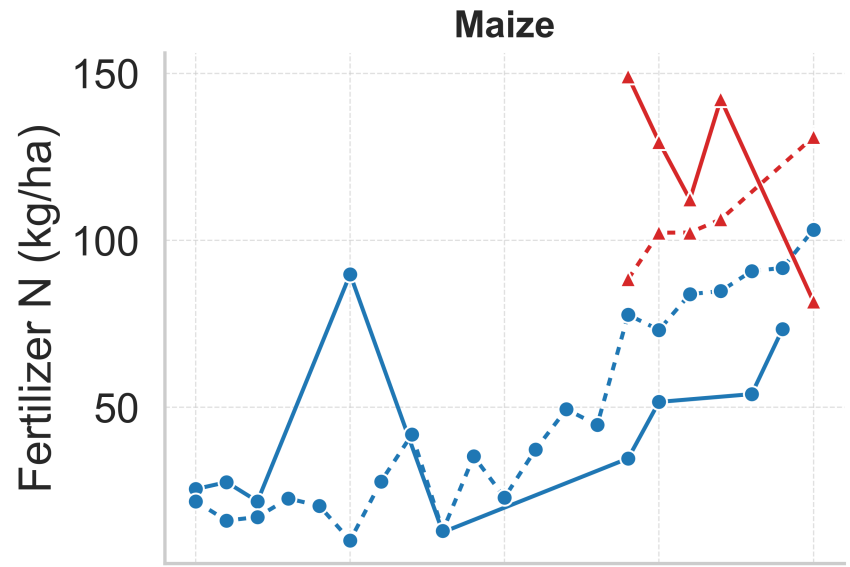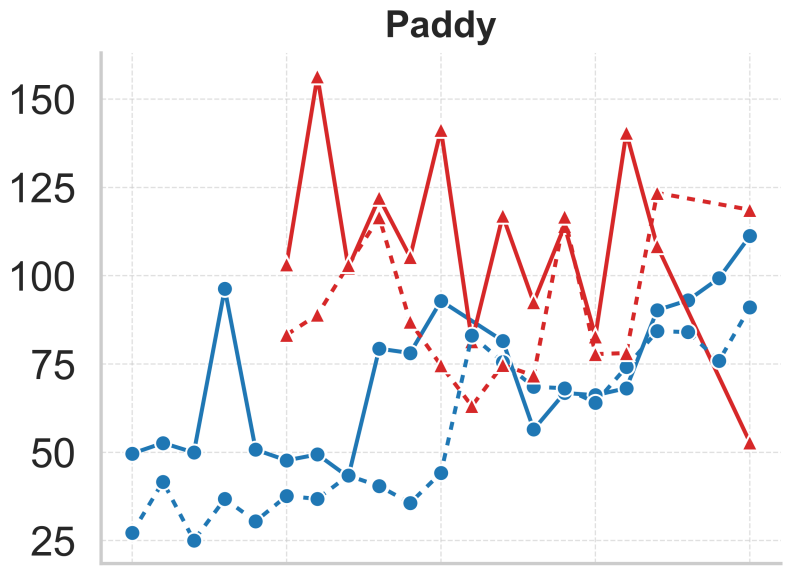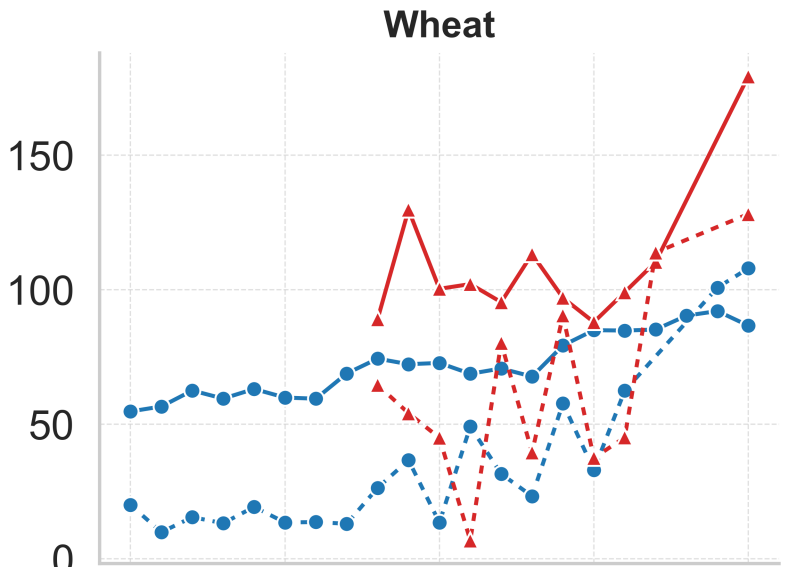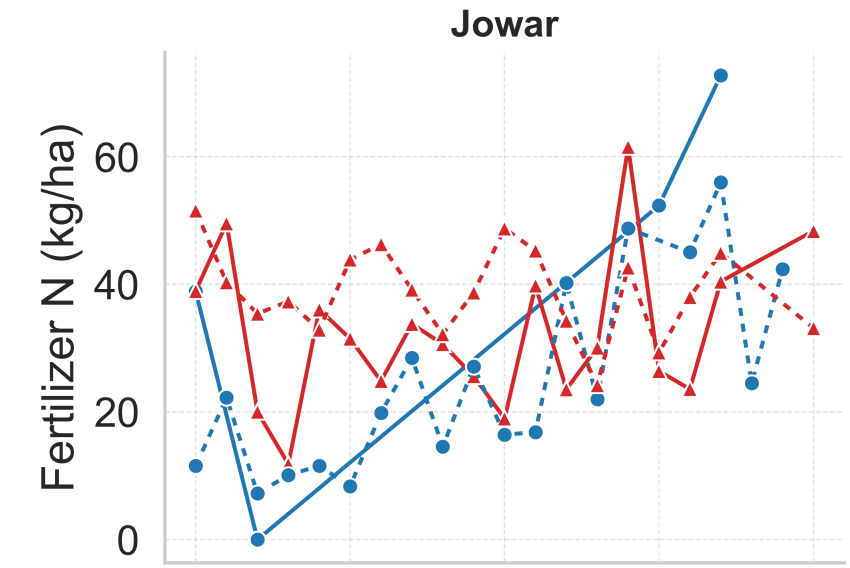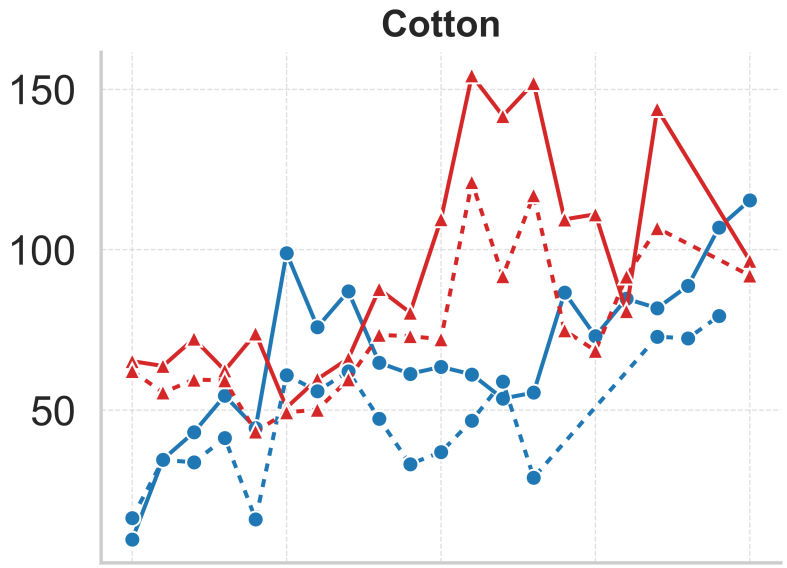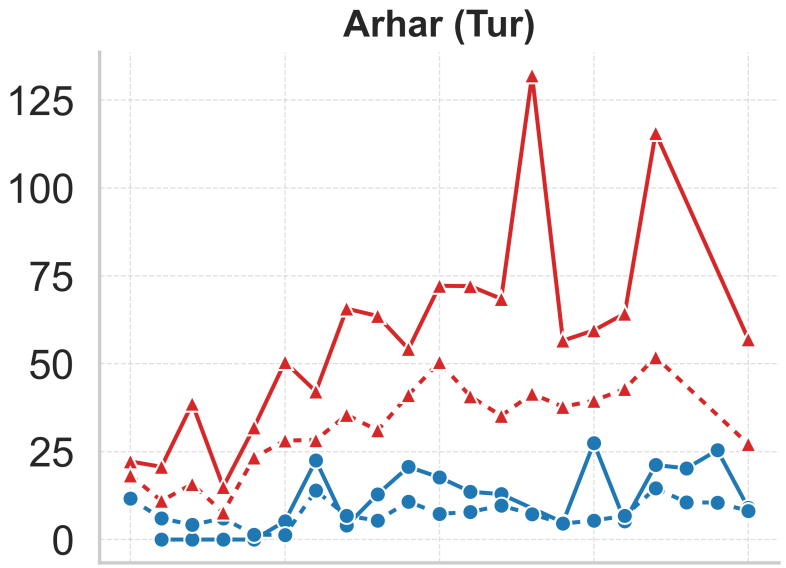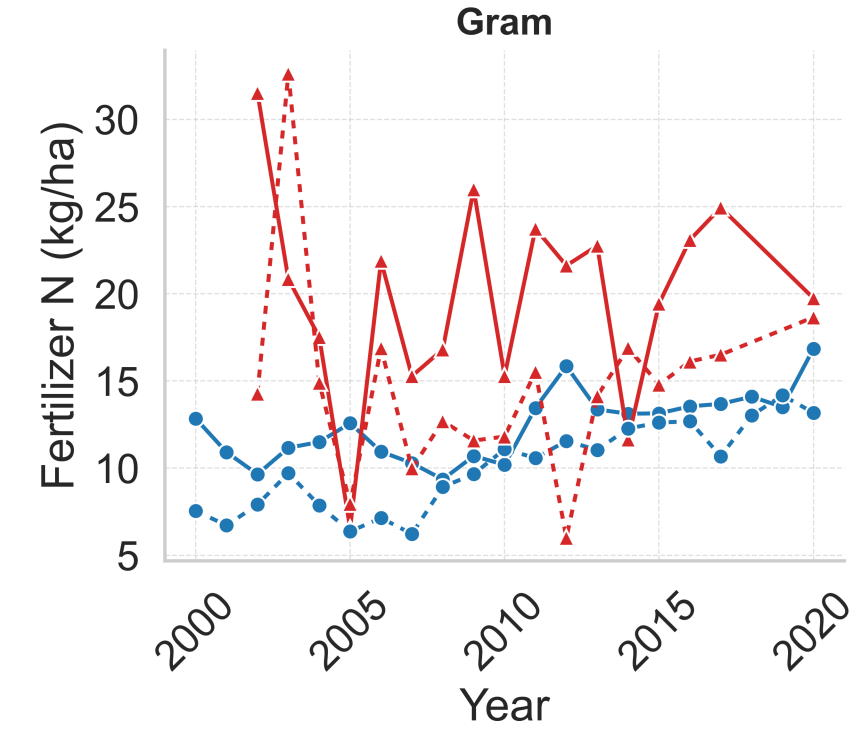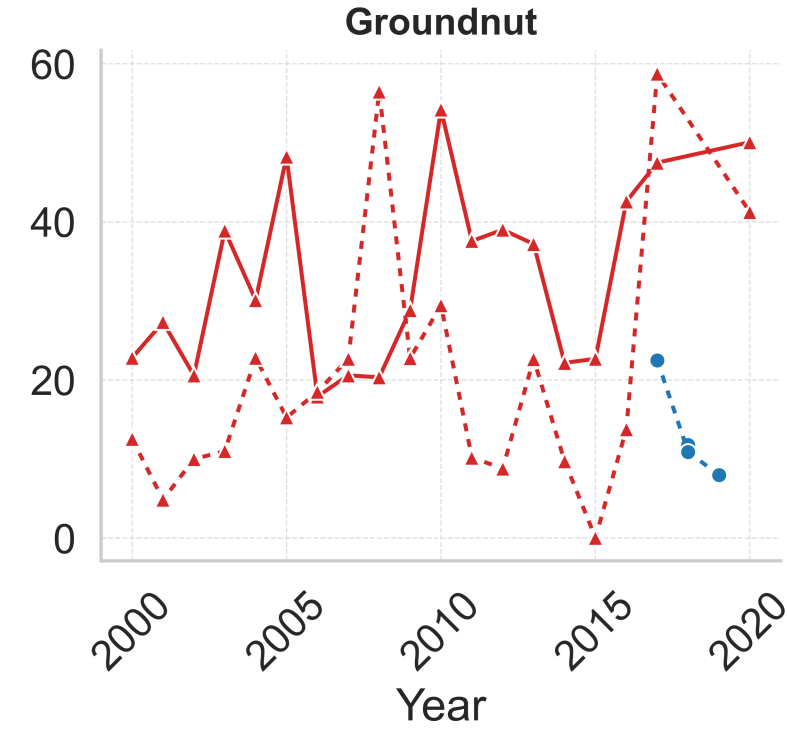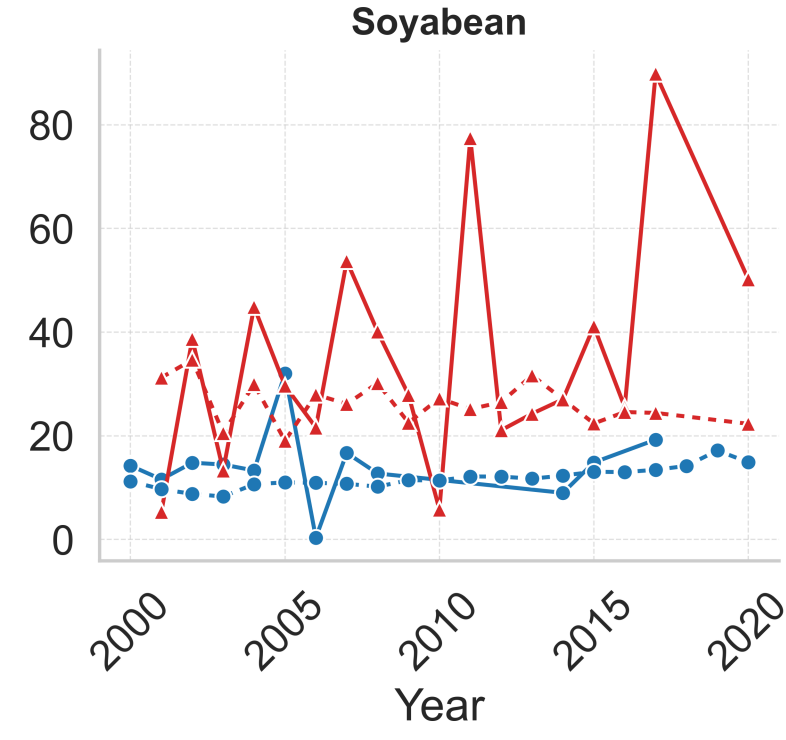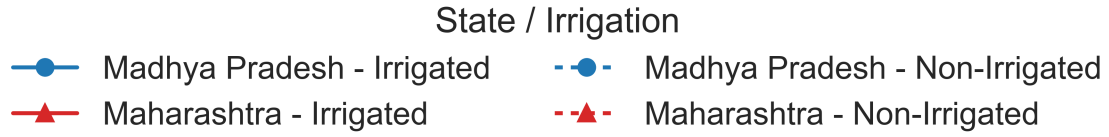

Supplementary Figure 8 – **Temporal trends in fertilizer nitrogen application by crop, irrigation status, and state.** Application rates (kg N ha<sup>-1</sup>) from 2000–2019, based on Government of India cost of cultivation surveys[2], are shown for nine major crops in Madhya Pradesh (MP) and Maharashtra (MH). Blue and red lines represent MP and MH, respectively, with solid lines for irrigated and dashed lines for non-irrigated fields.

# Temporal Evolution of Irrigated Area in Madhya Pradesh and Maharashtra

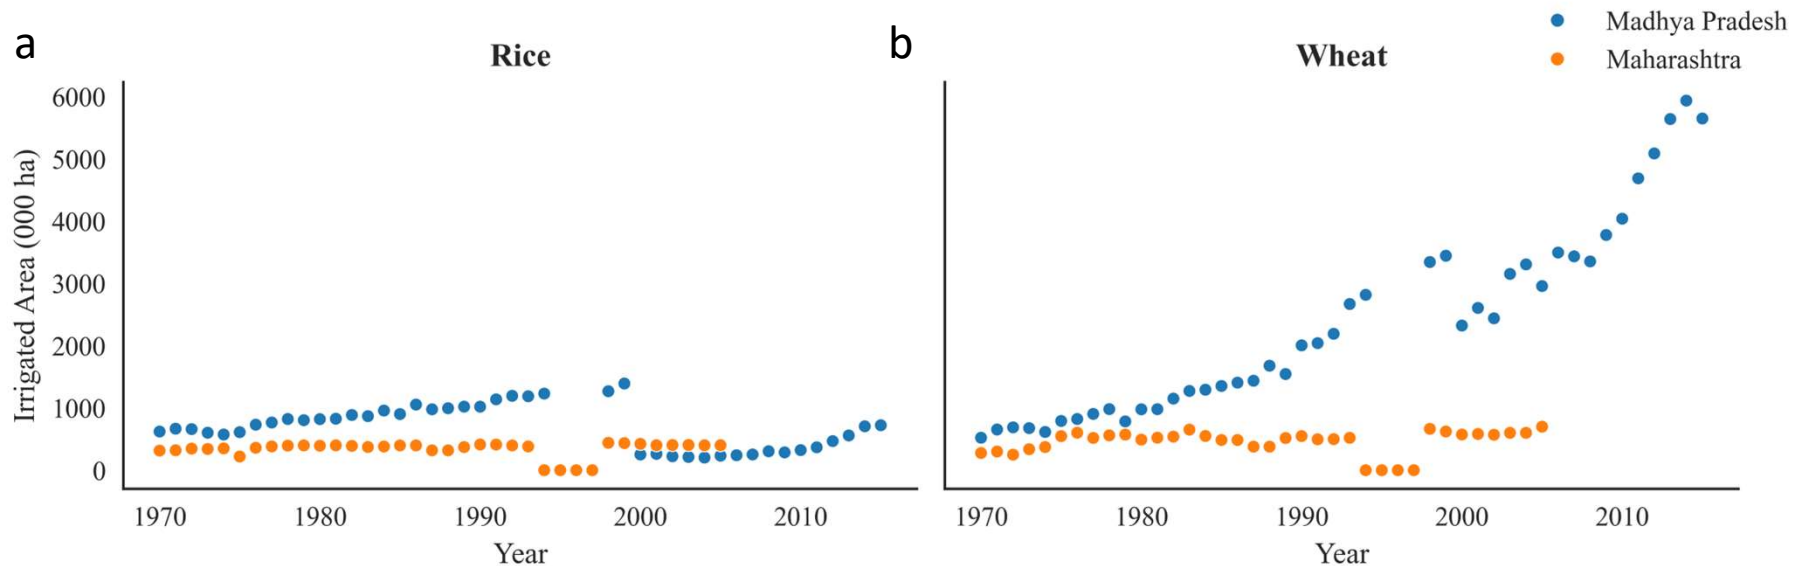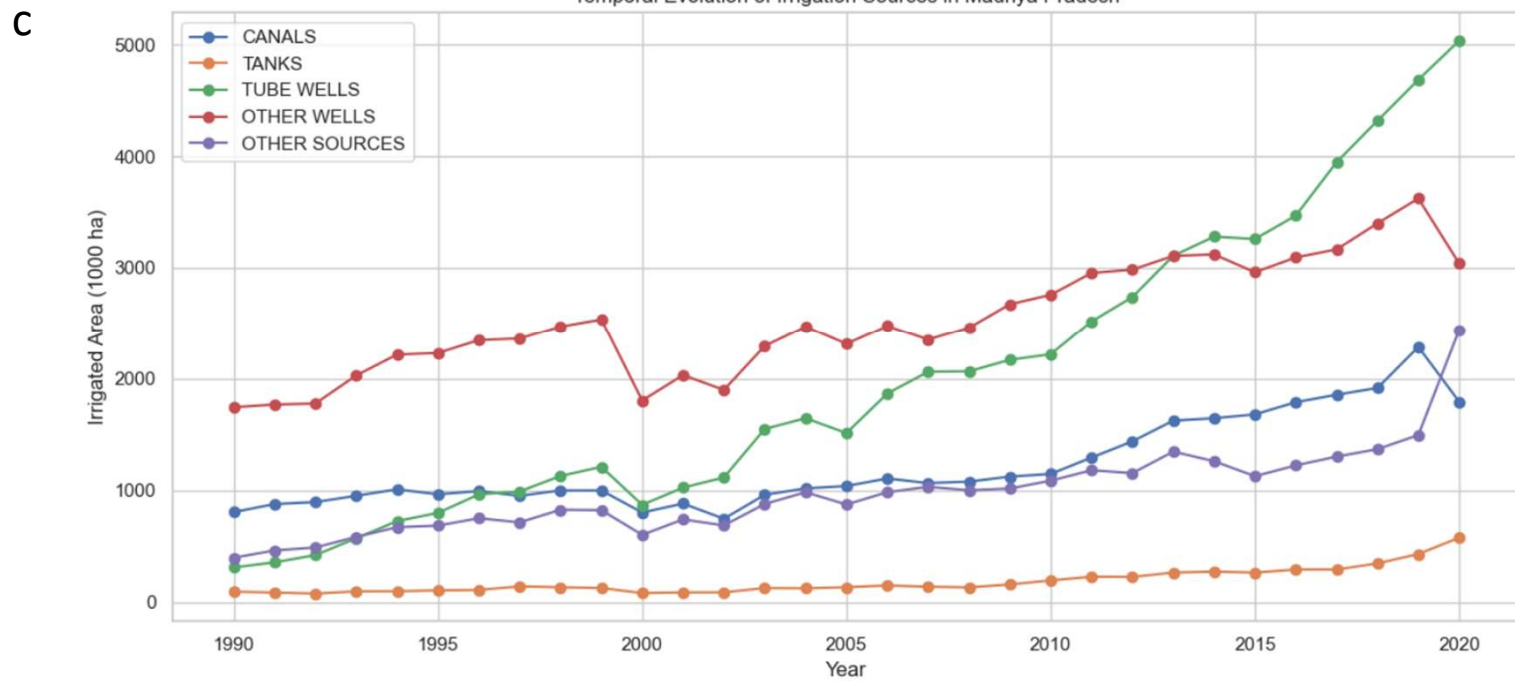

Supplementary Figure 9 – **Temporal trends of irrigated area and irrigation sources in Madhya Pradesh and Maharashtra.** Trends in irrigated area under rice and wheat are shown for 1970–2015, alongside the evolution of irrigation sources in Madhya Pradesh for 1990–2020 (data from Agricultural Statistics at a Glance, India[[3](#), [4](#)])

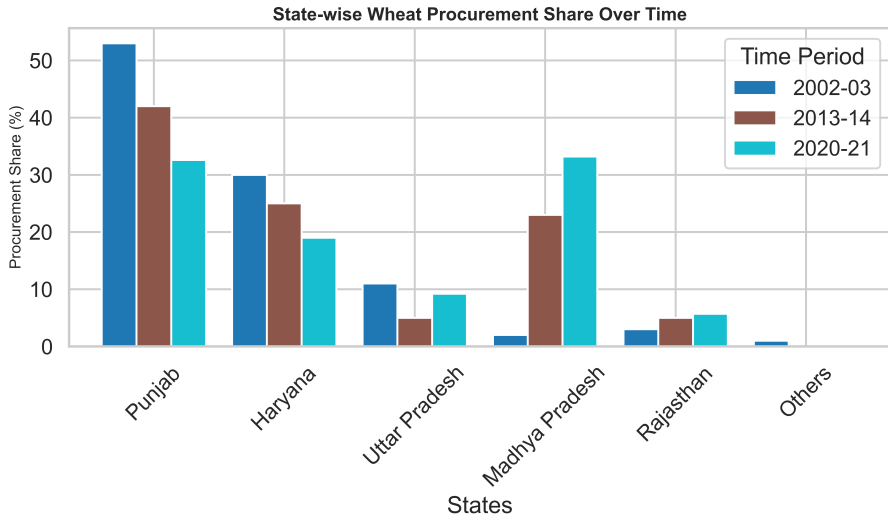



Supplementary Figure 10 – **Shifts in state-wise wheat procurement share in India over time.** Bar plots show the percentage share of wheat procurement by major states across three periods: 2002–03, 2013–14, and 2020–21.[\[5\]](#)

## Supplementary References

- [1] Commission, P., et al.: Agro-climatic regional planning: an overview (1989)
- [2] Ministry of Agriculture and Farmers Welfare, Government of India: Plot Level Summary Data Under the Cost of Cultivation Scheme. <https://desagri.gov.in/document-report-category/selected-zone-tehsil-district-block-year-wise/>. [Online; accessed 2022] (2022)
- [3] GOI, D.: Agricultural statistics at a glance 2018. Government of India, Ministry of Agriculture & Farmers Welfare, Department of Agriculture, Cooperation & Farmers Welfare, Directorate of Economics and Statistics (2018)
- [4] International Crops Research Institute for the Semi-Arid Tropics (ICRISAT): ICRISAT Data: Crops. Accessed: 2024-06-12 (2024). <http://data.icrisat.org/dld/src/crops.html>
- [5] Department of Food and Public Distribution (DFPD), Directorate of Economics & Statistics (DES): Department of Food and Public Distribution, Government of India. <https://dfpd.gov.in/en>. Accessed: 2025-09-07 (2025)
